# Supplementary material for: Intestinal microbiome analyses identify melanoma patients at risk for checkpoint-blockade-induced colitis
Source: Springer Nature journal article supplement (doi:10.1038/ncomms10391), 2016-02-02
Supplement: 41467_2016_BFncomms10391_MOESM502_ESM.pdf [file 41467_2016_BFncomms10391_MOESM502_ESM.pdf]

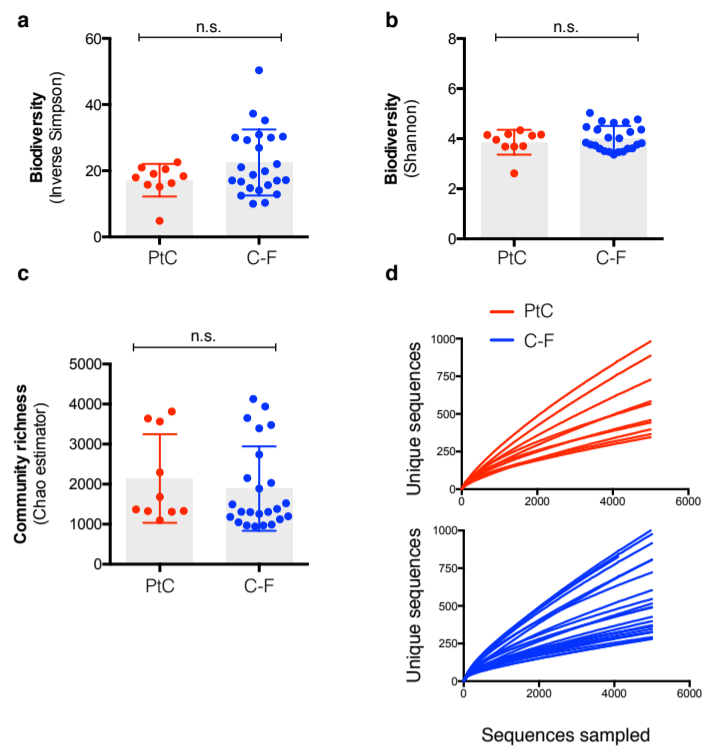

**Supplementary Figure 1 | Colitis-Free and Progressed to Colitis patients have similar levels of intestinal microbial diversity.** Biodiversity is estimated by a) the Inverse Simpson index and b) the Shannon index for each patient sample. Richness is measured by c) the Chao estimator and d) rarefaction curves. Mann-Whitney tests were used to compare microbial diversity parameters between the patient groups. Height of bar represents the mean, error bars represent standard deviation. C-F, Colitis-Free; PtC, Progressed to Colitis. C-F patients, n=24; PtC patients, n=10. n.s., not significant.

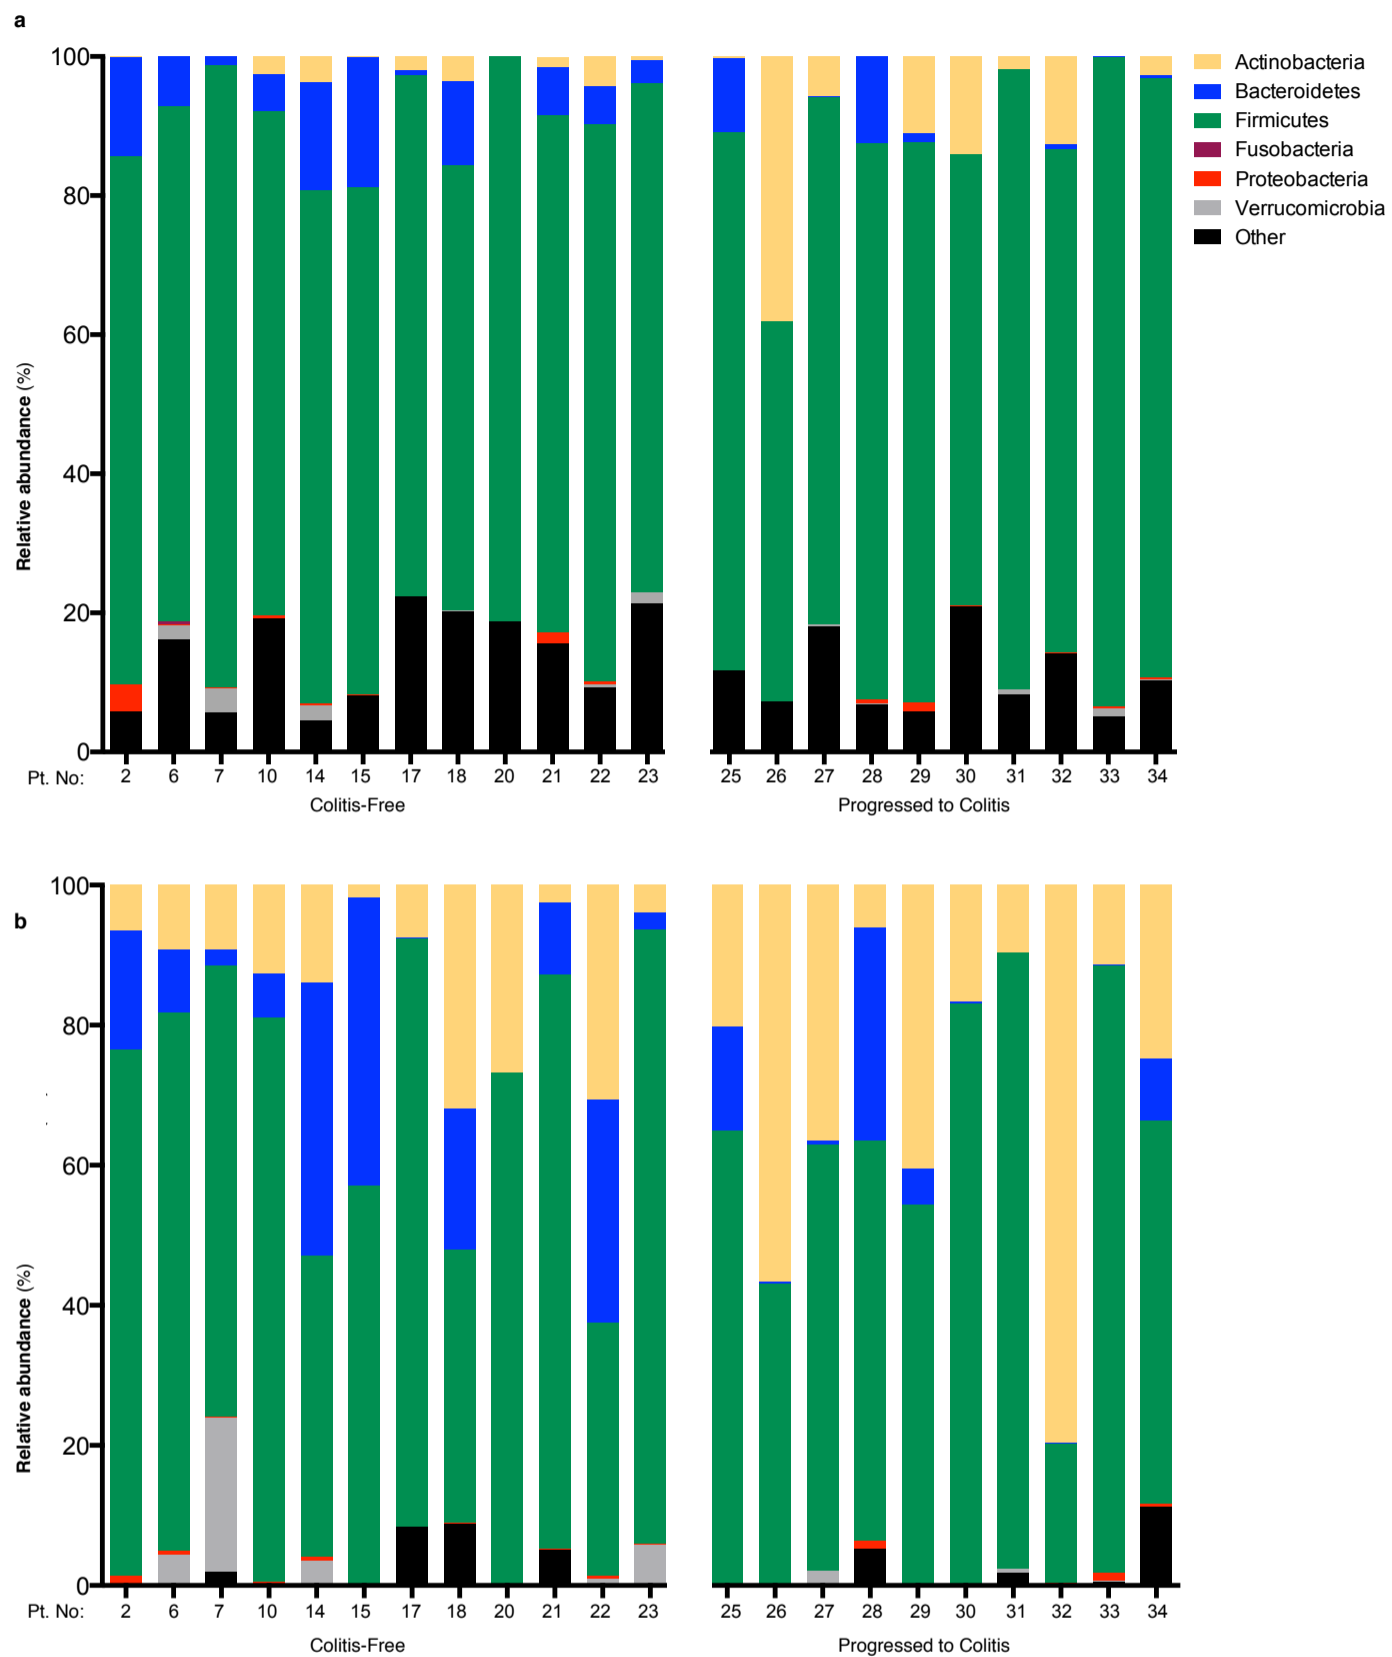

**Supplementary Figure 2 | Accuracy of bacterial taxonomic classification.** a) 16s sequencing reads were clustered into OTUs by 97% sequencing homology. Relative abundances of OTUs that met our defined threshold (of an average abundance greater than 0.01% in either patient group) were plotted by phylum. Bar plots were constructed only for those patients whose samples were subjected to shotgun metagenomic sequencing. b) Relative abundances of shotgun metagenomic sequencing reads were calculated using MetaPhlAn and plotted by phylum. OTUs, Operational Taxonomic Units. C-F patients, n=12; PtC patients, n=10.

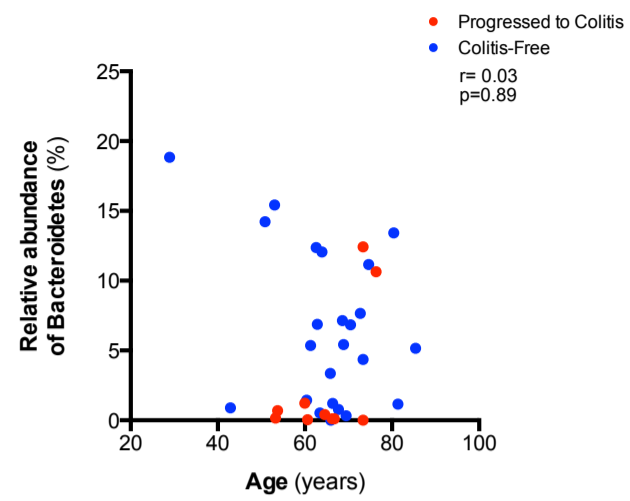

**Supplementary Figure 3 | Correlation between patient age and relative abundance of Bacteroidetes phylum.** Patient age was defined as of the first dose of ipilimumab. OTUs with an average abundance greater than 0.01% within either patient group were grouped by phylum. Spearman correlation test was performed on age and Bacteroidetes abundance.  $r$ , Rho coefficient;  $p$ , p-value; OTUs, Operational Taxonomic Units. C-F patients,  $n=24$ ; PtC patients,  $n=10$ .

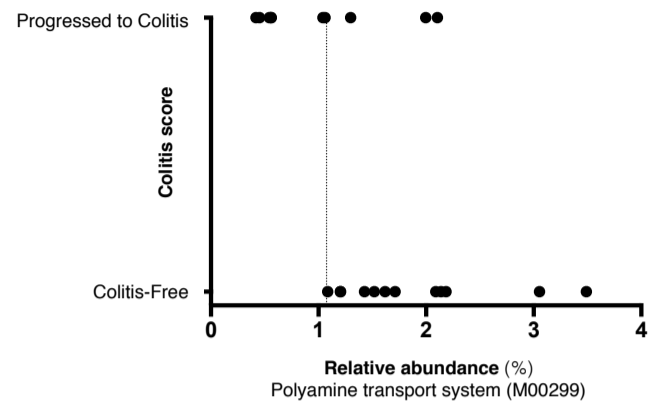

**Supplementary Figure 4 | Module abundance of the polyamine transport system.** The recursive partitioning algorithm estimated colitis status of patient samples based on polyamine transport system abundance alone. Samples with a module abundance of 1% or greater were classified as Colitis-Free by this algorithm. C-F patients, n=12; PtC patients, n=10.

| Patient group         | Patient no. | Colitis Score | Sex | Age | Prior Systemic Cancer Treatment(s)                              |
|-----------------------|-------------|---------------|-----|-----|-----------------------------------------------------------------|
| Colitis-Free          | 1           | 0             | M   | 62  | Tyrosinase DNA vaccine (in adjuvant setting)                    |
| Colitis-Free          | 2           | 0             | F   | 50  | Adjuvant Interferon                                             |
| Colitis-Free          | 3           | 0             | M   | 80  | -                                                               |
| Colitis-Free          | 4           | 0             | M   | 74  | Vemurafenib                                                     |
| Colitis-Free          | 5           | 0             | F   | 72  | -                                                               |
| Colitis-Free          | 6           | 0             | M   | 68  | -                                                               |
| Colitis-Free          | 7           | 0             | F   | 66  | -                                                               |
| Colitis-Free          | 8           | 0             | M   | 70  | -                                                               |
| Colitis-Free          | 9           | 0             | F   | 73  | Anti-gp75 monoclonal antibody IMC-20D7S; AZD6244; vemurafenib   |
| Colitis-Free          | 10          | 0             | F   | 61  | *Vemurafenib                                                    |
| Colitis-Free          | 11          | 0             | M   | 63  | -                                                               |
| Colitis-Free          | 12          | 0             | M   | 60  | -                                                               |
| Colitis-Free          | 13          | 0             | M   | 69  | -                                                               |
| Colitis-Free          | 14          | 0             | F   | 53  | Vemurafenib                                                     |
| Colitis-Free          | 15          | 0             | F   | 28  | *Vemurafenib                                                    |
| Colitis-Free          | 16          | 0             | M   | 85  | -                                                               |
| Colitis-Free          | 17          | 0             | F   | 67  | -                                                               |
| Colitis-Free          | 18          | 0             | M   | 63  | Cisplatin + vinblastine + temozolomide                          |
| Colitis-Free          | 19          | 0             | M   | 42  | Nivolumab (in clinical trial)                                   |
| Colitis-Free          | 20          | 0             | F   | 65  | Cisplatin + vinblastine + temozolomide + R04929097; vinblastine |
| Colitis-Free          | 21          | 0             | M   | 62  | -                                                               |
| Colitis-Free          | 22          | 0             | M   | 68  | Temozolomide                                                    |
| Colitis-Free          | 23          | 0             | F   | 65  | -                                                               |
| Colitis-Free          | 24          | 0             | M   | 81  | Temozolomide; AZD6224                                           |
| Progressed to Colitis | 25          | 2             | M   | 76  | Vaccine, GD2L-KLH with OPT-821                                  |
| Progressed to Colitis | 26          | 3             | F   | 66  | -                                                               |
| Progressed to Colitis | 27          | 3             | M   | 60  | Adjuvant Interferon                                             |
| Progressed to Colitis | 28          | 4             | M   | 53  | -                                                               |
| Progressed to Colitis | 29          | 3             | M   | 53  | Vemurafenib                                                     |
| Progressed to Colitis | 30          | 1             | F   | 59  | Temozolomide                                                    |
| Progressed to Colitis | 31          | 1             | M   | 73  | -                                                               |
| Progressed to Colitis | 32          | 1             | F   | 66  | -                                                               |
| Progressed to Colitis | 33          | 1             | M   | 73  | -                                                               |
| Progressed to Colitis | 34          | 2             | F   | 64  | -                                                               |

**Supplementary Table 1 | Patient characteristics and sample collection.** Colitis score was determined by retrospective chart review using CTCAE, with scores ranging from 0 (no diarrhea) to 4 (severe colitis). Patient age was defined as of the first dose of ipilimumab and rounded down to the nearest integer. Patients' history of systemic cancer therapy was determined by retrospective chart review. A total of 16 patients received systemic cancer treatment, either prior to ipilimumab monotherapy (14/16) or both before and during ipilimumab treatment course (2/16). The symbol (+) indicates treatments that are given concurrently, while symbol (;) indicates treatments administered at different times. The symbol (\*) indicates systemic cancer treatment administered both before and during ipilimumab therapy. C-F patients, n=24; PtC patients, n=10.
